# Supplementary material for: Probiotic activity of ropyLactiplantibacillus plantarumNA isolated from Chinese northeast sauerkraut and comparative evaluation of its live and heat-killed cells on antioxidant activity and RAW 264.7 macrophage stimulation
Source: Royal Society of Chemistry journal article supplement (doi:10.1039/d2fo03761k), 2023-01-01

Supplemental material

**Figure 1** Raw image of GAPDH expression determined by Western blot. 0: CK (Untreated cells); 1: Cells treated with LPS (+1  $\mu\text{g}/\text{mL}$ ); 2: Cells treated with  $10^7$  CFU/mL live *L. plantarum* NA; 3: Cells treated with  $10^7$  CFU/mL heat-killed *L. plantarum* NA; 4: Cells treated with  $10^8$  CFU/mL heat-killed *L. plantarum* NA

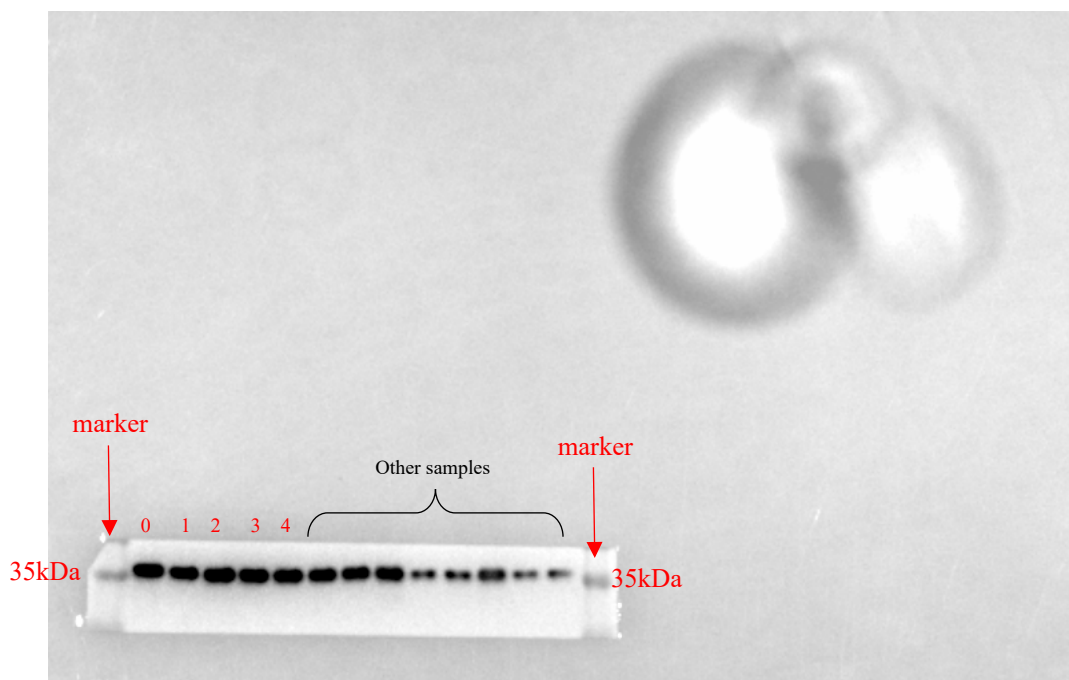

**Figure 2** Raw image of iNOS expression determined by Western blot. 0: CK (Untreated cells); 1: Cells treated with LPS (+1  $\mu\text{g}/\text{mL}$ ); 2: Cells treated with  $10^7$  CFU/mL live *L. plantarum* NA; 3: Cells treated with  $10^7$  CFU/mL heat-killed *L. plantarum* NA; 4: Cells treated with  $10^8$  CFU/mL heat-killed *L. plantarum* NA.

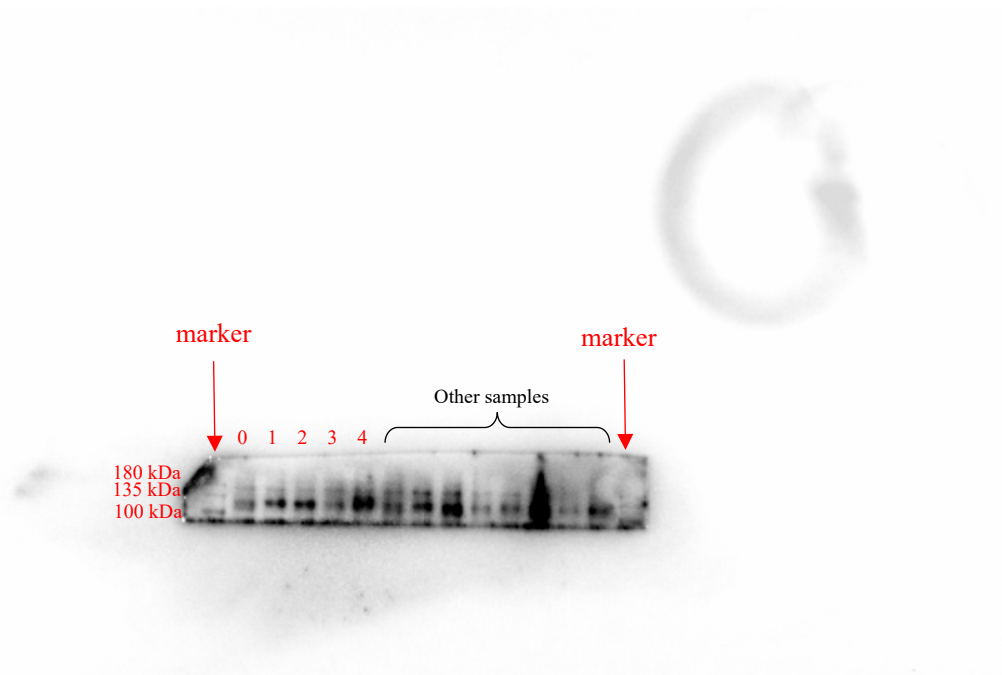

Supplement: d2fo03761k1.pdf [file d2fo03761k1.pdf]
